# Supplementary material
Source: publisher figshare collection journal article supplement (https://acs.figshare.com/ndownloader/files/4251664)
Supplement: Supplementary file 1 [file 4251664]

 
data_zach3 
 
_audit_creation_method            SHELXL 
_chemical_name_systematic 
; 
 ? 
; 
_chemical_name_common             ? 
_chemical_formula_moiety          ? 
_chemical_formula_structural      ? 
_chemical_formula_analytical      ? 
_chemical_formula_sum             'C13 H18 N2' 
_chemical_formula_weight          202.29 
_chemical_melting_point           ? 
_chemical_compound_source         ? 
 
loop_ 
 _atom_type_symbol 
 _atom_type_description 
 _atom_type_scat_dispersion_real 
 _atom_type_scat_dispersion_imag 
 _atom_type_scat_source 
 'C'  'C'   0.0033   0.0016 
 'International Tables Vol C Tables 4.2.6.8 and 6.1.1.4' 
 'H'  'H'   0.0000   0.0000 
 'International Tables Vol C Tables 4.2.6.8 and 6.1.1.4' 
 'N'  'N'   0.0061   0.0033 
 'International Tables Vol C Tables 4.2.6.8 and 6.1.1.4' 
 
_symmetry_cell_setting            monoclinic 
_symmetry_space_group_name_H-M    C2/c
 
loop_ 
 _symmetry_equiv_pos_as_xyz 
 'x, y, z' 
 '-x, y, -z+1/2' 
 'x+1/2, y+1/2, z' 
 '-x+1/2, y+1/2, -z+1/2' 
 '-x, -y, -z' 
 'x, -y, z-1/2' 
 '-x+1/2, -y+1/2, -z' 
 'x+1/2, -y+1/2, z-1/2' 
 
_cell_length_a                    16.649(3) 
_cell_length_b                    14.441(2) 
_cell_length_c                    20.354(3) 
_cell_angle_alpha                 90.00 
_cell_angle_beta                  92.70(3) 
_cell_angle_gamma                 90.00 
_cell_volume                      4888.0(14) 
_cell_formula_units_Z             16 
_cell_measurement_temperature     293(2) 
_cell_measurement_reflns_used     35
_cell_measurement_theta_min       10
_cell_measurement_theta_max       12.5
 
_exptl_crystal_description        blocks
_exptl_crystal_colour             none
_exptl_crystal_size_max           .4 
_exptl_crystal_size_mid           .4
_exptl_crystal_size_min           .3
_exptl_crystal_density_meas       ? 
_exptl_crystal_density_diffrn     1.100 
_exptl_crystal_density_method     none
_exptl_crystal_F_000              1760 
_exptl_absorpt_coefficient_mu     0.065 
_exptl_absorpt_correction_type    none 
_exptl_absorpt_correction_T_min   ? 
_exptl_absorpt_correction_T_max   ? 
 
_exptl_special_details 
; 
 ? 
; 
 
_diffrn_ambient_temperature       293(2) 
_diffrn_radiation_wavelength      0.71073 
_diffrn_radiation_type            MoK\a 
_diffrn_radiation_source          'fine-focus sealed tube' 
_diffrn_radiation_monochromator   graphite 
_diffrn_measurement_device        'STOE AED2 four circle diffractometer'
_diffrn_measurement_method        'profile fitted theta omega scans'
_diffrn_standards_number          3
_diffrn_standards_interval_count  ? 
_diffrn_standards_interval_time   '90 min' 
_diffrn_standards_decay_%         none
_diffrn_reflns_number             6182 
_diffrn_reflns_av_R_equivalents   0.0518 
_diffrn_reflns_av_sigmaI/netI     0.0600 
_diffrn_reflns_limit_h_min        -17 
_diffrn_reflns_limit_h_max        17 
_diffrn_reflns_limit_k_min        -15 
_diffrn_reflns_limit_k_max        15 
_diffrn_reflns_limit_l_min        -21 
_diffrn_reflns_limit_l_max        21 
_diffrn_reflns_theta_min          3.59 
_diffrn_reflns_theta_max          22.52 
_reflns_number_total              3183 
_reflns_number_observed           2406 
_reflns_observed_criterion        >2sigma(I) 
 
_computing_data_collection        'STOE DIF4'
_computing_cell_refinement        'STOE DIF4'
_computing_data_reduction         'STOE REDU4'
_computing_structure_solution     'SHELXS-86 (Sheldrick, 1990)' 
_computing_structure_refinement   'SHELXL-93 (Sheldrick, 1993)' 
_computing_molecular_graphics     SHELXTL
_computing_publication_material   SHELXTL
 
_refine_special_details 
; 
 Refinement on F^2^ for ALL reflections except for 2 with very negative F^2^ 
 or flagged by the user for potential systematic errors.  Weighted R-factors 
 wR and all goodnesses of fit S are based on F^2^, conventional R-factors R 
 are based on F, with F set to zero for negative F^2^. The observed criterion 
 of F^2^ > 2sigma(F^2^) is used only for calculating _R_factor_obs etc. and is 
 not relevant to the choice of reflections for refinement.  R-factors based 
 on F^2^ are statistically about twice as large as those based on F, and R- 
 factors based on ALL data will be even larger. 
; 
 
_refine_ls_structure_factor_coef  Fsqd  
_refine_ls_matrix_type            full 
_refine_ls_weighting_scheme 
 'calc w=1/[\s^2^(Fo^2^)+(0.0571P)^2^+1.8310P] where P=(Fo^2^+2Fc^2^)/3' 
_atom_sites_solution_primary      direct 
_atom_sites_solution_secondary    difmap 
_atom_sites_solution_hydrogens    geom 
_refine_ls_hydrogen_treatment     riding
_refine_ls_extinction_method      none 
_refine_ls_extinction_coef        ? 
_refine_ls_number_reflns          3181 
_refine_ls_number_parameters      279 
_refine_ls_number_restraints      0 
_refine_ls_R_factor_all           0.0709 
_refine_ls_R_factor_obs           0.0491 
_refine_ls_wR_factor_all          0.1328 
_refine_ls_wR_factor_obs          0.1142 
_refine_ls_goodness_of_fit_all    1.051 
_refine_ls_goodness_of_fit_obs    1.063 
_refine_ls_restrained_S_all       1.061 
_refine_ls_restrained_S_obs       1.063 
_refine_ls_shift/esd_max          0.000 
_refine_ls_shift/esd_mean         0.000 
 
loop_ 
 _atom_site_label 
 _atom_site_type_symbol 
 _atom_site_fract_x 
 _atom_site_fract_y 
 _atom_site_fract_z 
 _atom_site_U_iso_or_equiv 
 _atom_site_thermal_displace_type 
 _atom_site_occupancy 
 _atom_site_calc_flag 
 _atom_site_refinement_flags 
 _atom_site_disorder_group 
C1 C 0.10788(14) 0.3777(2) 0.35279(12) 0.0325(6) Uani 1 d . . 
C2 C 0.14903(14) 0.4044(2) 0.29797(12) 0.0325(6) Uani 1 d . . 
H2A H 0.13078(14) 0.3848(2) 0.25638(12) 0.039 Uiso 1 calc R . 
C3 C 0.21631(13) 0.4594(2) 0.30448(11) 0.0285(6) Uani 1 d . . 
H3A H 0.24311(13) 0.4755(2) 0.26707(11) 0.034 Uiso 1 calc R . 
C4 C 0.24609(13) 0.49234(15) 0.36670(11) 0.0254(5) Uani 1 d . . 
C5 C 0.20397(13) 0.4628(2) 0.42156(11) 0.0295(6) Uani 1 d . . 
H5A H 0.22180(13) 0.4817(2) 0.46341(11) 0.035 Uiso 1 calc R . 
C6 C 0.13734(14) 0.4067(2) 0.41481(12) 0.0336(6) Uani 1 d . . 
H6A H 0.11152(14) 0.3878(2) 0.45206(12) 0.040 Uiso 1 calc R . 
C7 C 0.0336(2) 0.3269(2) 0.34616(12) 0.0413(7) Uani 1 d . . 
N8 N -0.0275(2) 0.2897(2) 0.34145(12) 0.0600(7) Uani 1 d . . 
N9 N 0.31245(11) 0.54900(13) 0.37280(9) 0.0281(5) Uani 1 d . . 
C10 C 0.34532(13) 0.5755(2) 0.43844(11) 0.0297(6) Uani 1 d . . 
H10A H 0.33046(13) 0.5264(2) 0.46884(11) 0.036 Uiso 1 calc R . 
C11 C 0.3076(2) 0.6648(2) 0.46217(12) 0.0411(7) Uani 1 d . . 
H11A H 0.2501(2) 0.6585(4) 0.4603(8) 0.062 Uiso 1 calc R . 
H11B H 0.3225(8) 0.7151(3) 0.4345(5) 0.062 Uiso 1 calc R . 
H11C H 0.3263(8) 0.6769(6) 0.5067(3) 0.062 Uiso 1 calc R . 
C12 C 0.43705(14) 0.5807(2) 0.44157(13) 0.0405(7) Uani 1 d . . 
H12A H 0.45867(15) 0.5237(5) 0.4258(8) 0.061 Uiso 1 calc R . 
H12B H 0.4562(2) 0.5907(11) 0.4862(2) 0.061 Uiso 1 calc R . 
H12C H 0.45396(15) 0.6311(7) 0.4147(6) 0.061 Uiso 1 calc R . 
C13 C 0.33862(14) 0.6077(2) 0.31795(12) 0.0362(6) Uani 1 d . . 
H13A H 0.37281(14) 0.6553(2) 0.33913(12) 0.043 Uiso 1 calc R . 
C14 C 0.3931(2) 0.5574(2) 0.27202(13) 0.0522(8) Uani 1 d . . 
H14A H 0.4380(6) 0.5314(11) 0.2970(2) 0.078 Uiso 1 calc R . 
H14B H 0.4123(9) 0.6002(3) 0.2403(6) 0.078 Uiso 1 calc R . 
H14C H 0.3636(4) 0.5087(9) 0.2497(7) 0.078 Uiso 1 calc R . 
C15 C 0.2704(2) 0.6616(2) 0.28210(13) 0.0463(7) Uani 1 d . . 
H15A H 0.2360(6) 0.6878(10) 0.31375(13) 0.070 Uiso 1 calc R . 
H15B H 0.2398(6) 0.6204(3) 0.2536(6) 0.070 Uiso 1 calc R . 
H15C H 0.2927(2) 0.7102(8) 0.2565(7) 0.070 Uiso 1 calc R . 
C1' C 0.2931(2) 0.4797(2) 0.11523(11) 0.0389(7) Uani 1 d . . 
C2' C 0.30020(15) 0.5739(2) 0.10203(12) 0.0379(7) Uani 1 d . . 
H2'A H 0.35102(15) 0.5997(2) 0.09871(12) 0.045 Uiso 1 calc R . 
C3' C 0.23353(14) 0.6292(2) 0.09386(11) 0.0341(6) Uani 1 d . . 
H3'A H 0.24028(14) 0.6917(2) 0.08471(11) 0.041 Uiso 1 calc R . 
C4' C 0.15454(13) 0.5939(2) 0.09893(10) 0.0279(6) Uani 1 d . . 
C5' C 0.14893(15) 0.4984(2) 0.11331(11) 0.0338(6) Uani 1 d . . 
H5'A H 0.09853(15) 0.4720(2) 0.11788(11) 0.041 Uiso 1 calc R . 
C6' C 0.2163(2) 0.4435(2) 0.12069(12) 0.0396(7) Uani 1 d . . 
H6'A H 0.2104(2) 0.3807(2) 0.12952(12) 0.048 Uiso 1 calc R . 
C7' C 0.3636(2) 0.4228(2) 0.12370(13) 0.0499(8) Uani 1 d . . 
N8' N 0.4199(2) 0.3774(2) 0.13068(13) 0.0702(9) Uani 1 d . . 
N9' N 0.08792(11) 0.64907(13) 0.08850(9) 0.0289(5) Uani 1 d . . 
C10' C 0.00654(13) 0.6079(2) 0.08790(11) 0.0319(6) Uani 1 d . . 
H10B H 0.01192(13) 0.5427(2) 0.07540(11) 0.038 Uiso 1 calc R . 
C11' C -0.0273(2) 0.6094(2) 0.15569(13) 0.0448(7) Uani 1 d . . 
H11D H 0.0086(5) 0.5774(10) 0.1861(2) 0.067 Uiso 1 calc R . 
H11E H -0.0789(5) 0.5795(11) 0.1541(2) 0.067 Uiso 1 calc R . 
H11F H -0.0332(10) 0.6724(2) 0.1698(4) 0.067 Uiso 1 calc R . 
C12' C -0.05023(15) 0.6531(2) 0.03635(13) 0.0431(7) Uani 1 d . . 
H12D H -0.0247(4) 0.6557(10) -0.0049(2) 0.065 Uiso 1 calc R . 
H12E H -0.0630(8) 0.7147(5) 0.0502(4) 0.065 Uiso 1 calc R . 
H12F H -0.0987(4) 0.6173(7) 0.0314(6) 0.065 Uiso 1 calc R . 
C13' C 0.09047(15) 0.7512(2) 0.09754(12) 0.0341(6) Uani 1 d . . 
H13B H 0.03424(15) 0.7699(2) 0.10092(12) 0.041 Uiso 1 calc R . 
C14' C 0.1195(2) 0.8028(2) 0.03798(14) 0.0445(7) Uani 1 d . . 
H14D H 0.0916(7) 0.7801(8) -0.0011(2) 0.067 Uiso 1 calc R . 
H14E H 0.1762(2) 0.7932(10) 0.0348(5) 0.067 Uiso 1 calc R . 
H14F H 0.1089(9) 0.8678(2) 0.0427(4) 0.067 Uiso 1 calc R . 
C15' C 0.1327(2) 0.7819(2) 0.16239(13) 0.0455(7) Uani 1 d . . 
H15D H 0.1127(8) 0.7463(9) 0.1979(2) 0.068 Uiso 1 calc R . 
H15E H 0.1223(9) 0.8464(3) 0.1695(4) 0.068 Uiso 1 calc R . 
H15F H 0.1896(2) 0.7722(11) 0.1603(3) 0.068 Uiso 1 calc R . 
 
loop_ 
 _atom_site_aniso_label 
 _atom_site_aniso_U_11 
 _atom_site_aniso_U_22 
 _atom_site_aniso_U_33 
 _atom_site_aniso_U_23 
 _atom_site_aniso_U_13 
 _atom_site_aniso_U_12 
C1 0.0305(14) 0.0289(14) 0.037(2) 0.0021(11) -0.0048(11) -0.0050(12) 
C2 0.0300(14) 0.0331(14) 0.0337(14) -0.0065(11) -0.0054(11) 0.0000(12) 
C3 0.0267(13) 0.0305(13) 0.0281(13) -0.0004(10) 0.0004(10) -0.0013(11) 
C4 0.0225(13) 0.0220(12) 0.0313(13) 0.0001(10) -0.0021(10) 0.0021(11) 
C5 0.0300(14) 0.0303(13) 0.0276(13) 0.0002(10) -0.0039(10) -0.0010(11) 
C6 0.0314(14) 0.0347(14) 0.0347(14) 0.0062(12) 0.0021(11) -0.0030(12) 
C7 0.042(2) 0.041(2) 0.040(2) 0.0032(12) -0.0042(12) -0.0112(14) 
N8 0.049(2) 0.066(2) 0.064(2) 0.0081(13) -0.0083(13) -0.0263(15) 
N9 0.0246(11) 0.0319(11) 0.0273(11) 0.0013(9) -0.0030(8) -0.0045(9) 
C10 0.0298(14) 0.0300(13) 0.0286(13) 0.0022(10) -0.0073(10) -0.0032(11) 
C11 0.040(2) 0.042(2) 0.041(2) -0.0048(13) -0.0086(12) 0.0002(13) 
C12 0.0336(15) 0.045(2) 0.042(2) 0.0040(12) -0.0118(12) -0.0035(12) 
C13 0.0307(14) 0.046(2) 0.0317(14) 0.0061(12) -0.0056(11) -0.0149(12) 
C14 0.036(2) 0.083(2) 0.038(2) 0.0017(15) 0.0039(13) -0.011(2) 
C15 0.049(2) 0.044(2) 0.045(2) 0.0152(13) -0.0112(13) -0.0096(14) 
C1' 0.042(2) 0.047(2) 0.0278(14) -0.0057(12) -0.0059(11) 0.0168(14) 
C2' 0.0285(15) 0.053(2) 0.0320(14) -0.0018(12) -0.0025(11) 0.0063(13) 
C3' 0.0294(14) 0.0389(15) 0.0337(14) 0.0028(11) -0.0023(11) 0.0052(12) 
C4' 0.0289(14) 0.0325(14) 0.0220(12) -0.0018(10) -0.0014(10) 0.0046(11) 
C5' 0.0351(15) 0.0310(14) 0.0351(15) -0.0018(11) -0.0021(11) 0.0035(12) 
C6' 0.054(2) 0.0292(14) 0.035(2) -0.0018(11) -0.0056(12) 0.0089(14) 
C7' 0.050(2) 0.059(2) 0.040(2) -0.0118(14) -0.0067(13) 0.023(2) 
N8' 0.065(2) 0.081(2) 0.063(2) -0.0173(14) -0.0135(14) 0.042(2) 
N9' 0.0246(11) 0.0259(11) 0.0360(11) 0.0014(9) -0.0015(9) 0.0008(9) 
C10' 0.0259(13) 0.0286(14) 0.0408(15) 0.0001(11) -0.0008(11) -0.0029(11) 
C11' 0.039(2) 0.048(2) 0.047(2) 0.0024(13) 0.0067(12) -0.0075(13) 
C12' 0.0292(14) 0.047(2) 0.052(2) -0.0009(13) -0.0062(12) -0.0014(13) 
C13' 0.0288(14) 0.0279(14) 0.045(2) -0.0010(11) -0.0023(11) 0.0038(11) 
C14' 0.038(2) 0.0353(15) 0.059(2) 0.0132(13) -0.0034(13) 0.0027(13) 
C15' 0.047(2) 0.036(2) 0.052(2) -0.0105(13) -0.0071(13) -0.0019(14) 
 
_geom_special_details 
; 
 All esds (except the esd in the dihedral angle between two l.s. planes) 
 are estimated using the full covariance matrix.  The cell esds are taken 
 into account individually in the estimation of esds in distances, angles 
 and torsion angles; correlations between esds in cell parameters are only 
 used when they are defined by crystal symmetry.  An approximate (isotropic) 
 treatment of cell esds is used for estimating esds involving l.s. planes. 
; 
 
loop_ 
 _geom_bond_atom_site_label_1 
 _geom_bond_atom_site_label_2 
 _geom_bond_distance 
 _geom_bond_site_symmetry_2 
 _geom_bond_publ_flag 
C1 C2 1.391(3) . ? 
C1 C6 1.397(3) . ? 
C1 C7 1.439(4) . ? 
C2 C3 1.374(3) . ? 
C3 C4 1.420(3) . ? 
C4 N9 1.376(3) . ? 
C4 C5 1.412(3) . ? 
C5 C6 1.375(3) . ? 
C7 N8 1.150(3) . ? 
N9 C10 1.470(3) . ? 
N9 C13 1.483(3) . ? 
C10 C11 1.523(3) . ? 
C10 C12 1.527(3) . ? 
C13 C14 1.518(4) . ? 
C13 C15 1.533(3) . ? 
C1' C6' 1.390(4) . ? 
C1' C2' 1.393(4) . ? 
C1' C7' 1.438(4) . ? 
C2' C3' 1.371(3) . ? 
C3' C4' 1.419(3) . ? 
C4' N9' 1.374(3) . ? 
C4' C5' 1.414(3) . ? 
C5' C6' 1.376(3) . ? 
C7' N8' 1.146(3) . ? 
N9' C10' 1.479(3) . ? 
N9' C13' 1.486(3) . ? 
C10' C11' 1.515(3) . ? 
C10' C12' 1.525(3) . ? 
C13' C14' 1.521(3) . ? 
C13' C15' 1.531(3) . ? 
 
loop_ 
 _geom_angle_atom_site_label_1 
 _geom_angle_atom_site_label_2 
 _geom_angle_atom_site_label_3 
 _geom_angle 
 _geom_angle_site_symmetry_1 
 _geom_angle_site_symmetry_3 
 _geom_angle_publ_flag 
C2 C1 C6 118.5(2) . . ? 
C2 C1 C7 121.3(2) . . ? 
C6 C1 C7 120.1(2) . . ? 
C3 C2 C1 120.8(2) . . ? 
C2 C3 C4 121.9(2) . . ? 
N9 C4 C5 122.3(2) . . ? 
N9 C4 C3 121.7(2) . . ? 
C5 C4 C3 116.0(2) . . ? 
C6 C5 C4 121.8(2) . . ? 
C5 C6 C1 120.9(2) . . ? 
N8 C7 C1 177.0(3) . . ? 
C4 N9 C10 120.0(2) . . ? 
C4 N9 C13 122.3(2) . . ? 
C10 N9 C13 115.2(2) . . ? 
N9 C10 C11 111.5(2) . . ? 
N9 C10 C12 112.3(2) . . ? 
C11 C10 C12 111.8(2) . . ? 
N9 C13 C14 113.3(2) . . ? 
N9 C13 C15 114.3(2) . . ? 
C14 C13 C15 113.6(2) . . ? 
C6' C1' C2' 118.1(2) . . ? 
C6' C1' C7' 121.6(3) . . ? 
C2' C1' C7' 120.3(3) . . ? 
C3' C2' C1' 121.1(2) . . ? 
C2' C3' C4' 122.0(2) . . ? 
N9' C4' C5' 122.5(2) . . ? 
N9' C4' C3' 121.6(2) . . ? 
C5' C4' C3' 115.9(2) . . ? 
C6' C5' C4' 121.6(2) . . ? 
C5' C6' C1' 121.5(2) . . ? 
N8' C7' C1' 179.8(2) . . ? 
C4' N9' C10' 120.0(2) . . ? 
C4' N9' C13' 122.6(2) . . ? 
C10' N9' C13' 114.9(2) . . ? 
N9' C10' C11' 111.5(2) . . ? 
N9' C10' C12' 111.8(2) . . ? 
C11' C10' C12' 112.0(2) . . ? 
N9' C13' C14' 113.3(2) . . ? 
N9' C13' C15' 113.8(2) . . ? 
C14' C13' C15' 113.3(2) . . ? 
 
loop_ 
 _geom_torsion_atom_site_label_1 
 _geom_torsion_atom_site_label_2 
 _geom_torsion_atom_site_label_3 
 _geom_torsion_atom_site_label_4 
 _geom_torsion 
 _geom_torsion_site_symmetry_1 
 _geom_torsion_site_symmetry_2 
 _geom_torsion_site_symmetry_3 
 _geom_torsion_site_symmetry_4 
 _geom_torsion_publ_flag 
 C6 C1 C2 C3 -1.1(3) . . . . ? 
 C7 C1 C2 C3 174.6(2) . . . . ? 
 C1 C2 C3 C4 -0.9(4) . . . . ? 
 C2 C3 C4 N9 -178.6(2) . . . . ? 
 C2 C3 C4 C5 2.0(3) . . . . ? 
 N9 C4 C5 C6 179.5(2) . . . . ? 
 C3 C4 C5 C6 -1.1(3) . . . . ? 
 C4 C5 C6 C1 -0.9(4) . . . . ? 
 C2 C1 C6 C5 2.1(4) . . . . ? 
 C7 C1 C6 C5 -173.8(2) . . . . ? 
 C2 C1 C7 N8 -103.7(54) . . . . ? 
 C6 C1 C7 N8 72.0(54) . . . . ? 
 C5 C4 N9 C10 4.4(3) . . . . ? 
 C3 C4 N9 C10 -175.0(2) . . . . ? 
 C5 C4 N9 C13 -156.8(2) . . . . ? 
 C3 C4 N9 C13 23.8(3) . . . . ? 
 C4 N9 C10 C11 -90.5(2) . . . . ? 
 C13 N9 C10 C11 72.0(2) . . . . ? 
 C4 N9 C10 C12 143.1(2) . . . . ? 
 C13 N9 C10 C12 -54.4(3) . . . . ? 
 C4 N9 C13 C14 -86.3(3) . . . . ? 
 C10 N9 C13 C14 111.7(2) . . . . ? 
 C4 N9 C13 C15 46.0(3) . . . . ? 
 C10 N9 C13 C15 -116.0(2) . . . . ? 
 C6' C1' C2' C3' -0.8(4) . . . . ? 
 C7' C1' C2' C3' -180.0(2) . . . . ? 
 C1' C2' C3' C4' 0.6(4) . . . . ? 
 C2' C3' C4' N9' -177.8(2) . . . . ? 
 C2' C3' C4' C5' 0.4(3) . . . . ? 
 N9' C4' C5' C6' 177.1(2) . . . . ? 
 C3' C4' C5' C6' -1.1(3) . . . . ? 
 C4' C5' C6' C1' 0.9(4) . . . . ? 
 C2' C1' C6' C5' 0.1(4) . . . . ? 
 C7' C1' C6' C5' 179.2(2) . . . . ? 
 C6' C1' C7' N8' -82.9(1000) . . . . ? 
 C2' C1' C7' N8' 96.2(1000) . . . . ? 
 C5' C4' N9' C10' -3.9(3) . . . . ? 
 C3' C4' N9' C10' 174.1(2) . . . . ? 
 C5' C4' N9' C13' 157.1(2) . . . . ? 
 C3' C4' N9' C13' -24.9(3) . . . . ? 
 C4' N9' C10' C11' 91.2(2) . . . . ? 
 C13' N9' C10' C11' -71.2(3) . . . . ? 
 C4' N9' C10' C12' -142.5(2) . . . . ? 
 C13' N9' C10' C12' 55.1(3) . . . . ? 
 C4' N9' C13' C14' 83.3(3) . . . . ? 
 C10' N9' C13' C14' -114.8(2) . . . . ? 
 C4' N9' C13' C15' -48.0(3) . . . . ? 
 C10' N9' C13' C15' 113.9(2) . . . . ? 
 
_refine_diff_density_max    0.169 
_refine_diff_density_min   -0.208 
_refine_diff_density_rms    0.044 
